# Supplementary material
Source: Springer Nature journal article supplement (https://www.springermedizin.de/resource/supplementary/13046_2011_503_MOESM2_ESM.pdf/9662376)

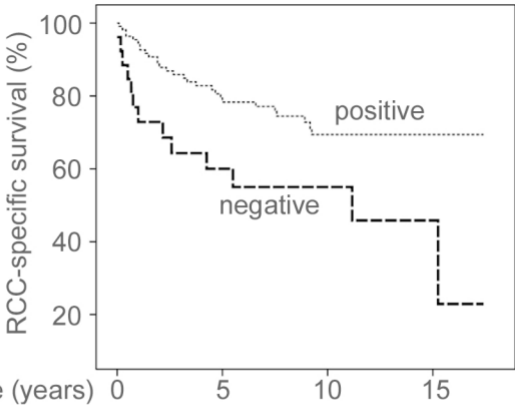

|               | <u>Number of patients at risk</u> |    |    |
|---------------|-----------------------------------|----|----|
|               | 0                                 | 5  | 10 |
| TLR9 positive | 112                               | 69 | 37 |
| TLR9 negative | 26                                | 12 | 8  |

Supplement: MOESM2 [file 9662376]
